# Supplementary material for: Metabolic cost and mechanical work of walking in a virtual reality emulator
Source: Eur J Appl Physiol. 2023 Sep 30;124(3):783–92. doi: 10.1007/s00421-023-05306-0 (PMC10879236; doi:10.1007/s00421-023-05306-0)
Supplement: Supplementary file 1 — Supplementary file1 (XLSX 43 KB) [file 421_2023_5306_MOESM1_ESM.xlsx]

## Sheet: Foglio1
ID	Stride frequency (Hz)	V'O2 rest stand (mL kg-1 min-1)	V'O2 gross (mL kg-1 min-1)	RER	HR (bpm)	C (J kg-1 m-1)	RF (min-1)	Vt (L)	VE (L min-1)	Speed (m s-1)	Stride length (m)	Double contact time (s)	Double contact time (% stride period)	Left contact time(s)	Righ contact time (s)	Duty factor (%)	Wext (J kg-1 m-1)	Wint,k (J kg-1 m-1)	Wtot (J kg-1 m-1)	Recovery (%)	Efficiency	EfficiencyWS
0	0.7	4.40163	18.7982	0.760398	92.619	7.59756	24.8632	1.26186	30.6155	0.577241	0.888484	0.763514	50.9043	1.12316	1.14158	75.5575	0.205	0.085	0.29	12.75	0.0381702	0.182953
0	0.85	4.40163	21.7616	0.801895	99.3846	8.40745	30.7638	1.25227	38.164	0.663653	0.781485	0.565714	49.0091	0.8438	0.876	74.5147	0.247	0.152	0.399	17.78	0.0474579	0.178294
0	1	4.40163	22.9158	0.86304	106.019	7.51963	31.8739	1.37251	42.7294	0.79016	0.803884	0.480526	48.0804	0.727931	0.752069	74.0127	0.212	0.156	0.368	25.72	0.0489386	0.195222
0	1.15	4.40163	31.2144	0.865803	130.121	8.05233	34.8319	1.6046	55.0538	1.10834	0.963598	0.408806	47.6882	0.620882	0.644706	73.8712	0.21	0.171	0.381	27.63	0.0473155	0.183922
1	0.7	3.95136	21.402	0.809348	105.043	9.87635	27.5828	1.45009	39.4675	0.595039	0.874046	0.618889	43.3082	1.10865	0.940833	71.7009	0.519	0.206	0.725	6.46	0.0734077	0.184785
1	0.85	3.95136	26.2075	0.878654	115.038	8.99762	30.9213	1.69975	52.3138	0.856814	1.02853	0.541837	46.0811	0.865102	0.853	73.0536	0.425	0.213	0.638	10.18	0.0709076	0.193162
1	1	3.95136	31.213	0.888596	129.544	9.19309	35.0907	1.87339	64.3125	0.945412	0.963644	0.229649	22.9364	0.562807	0.668103	61.4592	0.341	0.265	0.606	17.55	0.0659191	0.185574
1	1.15	3.95136	35.9	0.882615	141.462	9.84368	37.9192	2.00963	75.6633	1.09711	0.968731	0.375821	43.1843	0.644559	0.57	69.8022	0.326	0.322	0.648	24.64	0.065829	0.177576
2	0.7	4.85407	18.4585	0.701458	107.438	11.1486	32.775	0.738563	23.748	0.389314	0.57598	0.909737	63.5141	1.11103	1.18	79.4646	0.583	0.299	0.882	11.8	0.079113	0.17778
2	0.85	4.85407	20.5526	0.77386	114.263	10.6082	35.1219	0.845596	28.7809	0.481977	0.579175	0.61875	52.5328	0.864898	0.928511	76.1763	0.575	0.341	0.916	11.8	0.0863486	0.190042
2	1	4.85407	22.4465	0.795	121	9.33974	37.15	0.881067	31.6393	0.626408	0.637837	0.500877	50.0653	0.733966	0.763509	74.8221	0.506	0.285	0.791	15.9	0.0846918	0.202468
2	1.15	4.85407	23.9041	0.819062	128.922	10.7759	38.4247	0.937094	35.5395	0.601376	0.530802	0.424412	48.8511	0.632174	0.656154	74.0542	0.438	0.399	0.837	25.9	0.0776732	0.179753
3	0.7	4.89714	15.19	0.726078	114.118	13.436	32.0002	0.749843	23.3847	0.262931	0.385678	0.808947	56.4683	1.07641	1.16053	78.2566	0.603	0.264	0.867	10.3	0.064528	0.146397
3	0.85	4.89714	18.6457	0.77375	128.286	16.1367	34.4257	0.877732	29.7357	0.315996	0.379195	0.601667	51.0759	0.842041	0.935417	75.6037	0.734	0.374	1.108	9.7	0.0686633	0.136831
3	1	4.89714	22.1185	0.784833	146.267	13.7039	35.0023	1.05102	35.0163	0.431764	0.439243	0.44125	44.1294	0.748772	0.687895	71.8712	0.662	0.442	1.104	13.7	0.0805609	0.16083
3	1.15	4.89714	23.3917	0.854783	154.652	14.047	41.4748	1.02825	42.2299	0.456707	0.411994	0.339048	38.2099	0.629841	0.597077	69.1005	0.811	0.492	1.303	12.71	0.0927597	0.171068
4	0.7	4.02375	16.3512	0.740606	96.5758	11.5594	20.3979	1.33364	25.8365	0.306378	0.448726	0.755385	52.9133	1.02225	1.12806	75.2908	0.477	0.182	0.659	18	0.0570098	0.15217
4	0.85	4.02375	18.7858	0.779091	106.848	10.0438	21.0658	1.54603	30.3081	0.508244	0.613419	0.424694	36.9162	0.830816	0.764884	66.1052	0.406	0.169	0.575	17.9	0.0572493	0.16677
4	1	4.02375	22.2407	0.793333	122.048	8.34522	25.4267	1.53848	37.4689	0.609936	0.62374	0.502281	50.3494	0.678276	0.549828	61.0997	0.371	0.156	0.527	13	0.0631499	0.194962
4	1.15	4.02375	25.6075	0.82125	138.55	8.40544	25.7108	1.82428	44.5239	0.759595	0.684804	0.433385	47.9237	0.642879	0.694697	75.3242	0.397	0.179	0.576	11	0.068527	0.199395
5	0.7	4.14548	15.2847	0.738627	118.294	14.9888	30.4976	1.01047	30.242	0.250175	0.369843	0.891667	62.3609	1.17677	1.1403	80.9802	0.555	0.218	0.773	10.1	0.0515717	0.12496
5	0.85	4.14548	17.8704	0.774528	126	15.2151	32.4087	1.09364	35.3459	0.303663	0.364205	0.72125	61.414	0.970408	0.92551	80.6844	0.697	0.369	1.066	7.75	0.0700621	0.142359
5	1	4.14548	19.3795	0.779825	132.632	14.9697	33.6167	1.1484	38.5386	0.342577	0.348347	0.59193	59.1837	0.821897	0.769474	79.6235	0.644	0.48	1.124	14	0.0750851	0.148567
5	1.15	4.14548	21.7342	0.781228	140.333	13.8872	34.3542	1.24205	42.1816	0.42636	0.375972	0.522121	60.1399	0.714925	0.676269	80.0773
6	0.7	5.43052	12.7087	0.69617	68.4468	8.86716	28.4515	0.837851	23.4108	0.26854	0.396661	1.28974	89.7412	1.36718	1.34425	94.1971	0.763	0.343	1.106	6.24	0.12473	0.248783
6	0.85	5.43052	13.6953	0.742745	77.3529	8.80152	30.4857	0.906627	27.3731	0.307215	0.377548	0.971458	80.8022	1.025	1.13326	89.6786	0.784	0.429	1.213	5.3	0.137817	0.262795
6	1	5.43052	15.3557	0.750377	87.6226	10.6776	31.9762	0.955453	30.0724	0.304112	0.392411	1.02263	78.2336	1.125	0.925818	80.8616	0.634	0.489	1.123	8.14	0.105174	0.208194
6	1.15	5.43052	16.985	0.743393	89.6786	9.95466	33.1884	0.983625	32.5185	0.379746	0.421885	0.999355	90.406	1.03159	0.863333	86.658	0.448	0.412	0.86	12	0.0863917	0.196893
7	0.7	3.88813	14.3959	0.698367	92.7347	13.2927	28.1929	0.691918	19.3777	0.258624	0.378496	1.0295	71.9753	1.26146	1.19282	85.9461	0.684	0.281	0.965	14.8	0.0725965	0.155349
7	0.85	3.88813	15.6485	0.735532	96.7872	13.6572	28.5655	0.765574	21.4136	0.281728	0.338073	0.690816	58.721	0.923	0.939583	79.1915	0.827	0.409	1.236	10.7	0.0905019	0.171046
7	1	3.88813	17.8731	0.762692	106.077	13.7462	31.4827	0.821962	25.4957	0.33285	0.338631	0.59614	59.6528	0.797931	0.797759	79.7982	0.9	0.476	1.376	5.9	0.100101	0.180123
7	1.15	3.88813	20.2841	0.778889	117.556	15.7546	32.9346	0.909463	29.3526	0.340485	0.300297	0.476667	54.8606	0.655821	0.690299	77.4695	0.952	0.529	1.481	4.6	0.0940042	0.163825
8	0.7	3.35409	14.1116	0.733061	111.408	15.1966	29.8114	1.18269	32.6078	0.231599	0.340207	0.954211	66.7398	1.14308	1.24256	83.3393	0.6	0.222	0.822	14.15	0.0540912	0.126476
8	0.85	3.35409	14.4435	0.770204	112.265	16.3802	30.4049	1.21955	34.8796	0.221492	0.266482	0.715208	60.6914	0.889388	1.00429	80.3377	0.704	0.339	1.043	14	0.0636746	0.130829
8	1	3.35409	16.4304	0.787234	121.362	16.219	29.7932	1.41417	38.8173	0.263774	0.268447	0.64807	64.7757	0.790345	0.858793	82.4427	0.593	0.331	0.924	16.7	0.0569703	0.124792
8	1.15	3.35409	18.475	0.8075	131.25	17.3591	28.1173	1.64725	42.7079	0.284984	0.251779	0.597727	68.7897	0.717463	0.751045	84.368	0.544	0.356	0.9	21.9	0.0518461	0.115214
9	0.7	4.1881	12.5613	0.731579	75.6842	11.8819	23.2453	1.09597	25.4782	0.230555	0.338621	0.862821	60.2315	1.08225	1.21375	80.1676
9	0.85	4.1881	14.8372	0.746279	82.3953	8.5824	25.1537	1.17637	29.5606	0.405951	0.488579	0.784694	66.5447	1	0.9634	83.2669
9	1	4.1881	15.9652	0.747143	81.9048	9.77606	24.7855	1.26893	31.442	0.394135	0.401188	0.586667	58.6315	0.774138	0.813103	79.3347
9	1.15	4.1881	18.3055	0.759318	92	10.5116	26.5466	1.35725	34.8205	0.439393	0.390924	0.474091	54.0845	0.657576	0.692687	77.0512
