# Supplementary material for: Metabolic cost and mechanical work of walking in a virtual reality emulator
Source: Eur J Appl Physiol. 2023 Sep 30;124(3):783–92. doi: 10.1007/s00421-023-05306-0 (PMC10879236; doi:10.1007/s00421-023-05306-0)
Supplement: Supplementary file 2 — Supplementary file2 (XLSX 11 KB) [file 421_2023_5306_MOESM2_ESM.xlsx]

## Sheet: Foglio1
	Second order polynomial (y = B0 + B1x + B2x^2)				Linear regression (y = B0 + B1x)
	C Omni				Wext Omni	Wint,k Omni	Wtot Omni	Energy recovery Omni	Efficiency Omni	EfficiencyWS Omni
Best-fit values				Best-fit values
B0	20.23			B0	0.8301	0.4098	1.24	7.386	0.0864	0.152
B1	-27.49			B1	-0.5774	-0.2093	-0.7867	13.26	-0.02693	0.04412
B2	15.82
95% Confidence Intervals				95% Confidence Intervals
B0	16.46 to 24.00			B0	0.726 to 0.934	0.329 to 0.492	1.066 to 1.414	3.530 to 11.240	0.071 to 0.102	0.129 to 0.176
B1	-41.75 to -13.23			B1	-0.770 to -0.384	-0.362 to -0.0568	-1.110 to -0.463	6.088 to 20.430	-0.056 to 0.002	0.001 to 0.088
B2	4.506 to 27.12
